# Supplementary material
Source: Springer Nature journal article supplement (https://www.springermedizin.de/resource/supplementary/12877_2011_687_MOESM2_ESM.pdf/9439986)
Supplement: MOESM2 [file 9439986]

Search period**PubMed**

[958 articles retrieved (AR)]

Date: 3/11/08

**Embase**

[555 AR]

**CINAHL**

[416 AR]

**PsychInfo**

[263 AR]

Total yield  
n = 2,192 manuscripts

Title & abstract review of 2,192 prompts

full review of 106 manuscripts

n = 46 PubMed + 14 Embase + 12 CINAHL + 23 PsychInfo

+ 11 Reference section of captured articles

= 106 papers for full review

Inclusion/exclusion criteria applied:

**Reason for exclusion**

Hierarchy assessed by non-IRT  
methods = 24

Mean-age below age 60; individuals  
below age 50 = 13

Specialised scales, e.g., mobility,  
motor, or depression = 6

Sample includes proxy reports = 2

Non English articles = 6

Hospitalised, institutionalized, or  
inpatient rehabilitation = 11

Sample disease-specific, e.g., arthritis  
group, mental illness, frail sample, hip  
replacement, spinal syndrome, etc. =  
14

Data availability, such as logit  
information = 6

Total excluded = 82

-12 Guttman scaling manuscripts  
(see 'Additional files')

12 Manuscripts with ADL-IADL scales revised or developed via IRT methodology  
(includes Parametric and Nonparametric models)
